# Supplementary material for: A size-selective method for increasing the performance of Pt supported on tungstated zirconia catalysts for alkane isomerization: a combined experimental and theoretical DFT study
Source: Royal Society of Chemistry journal article supplement (doi:10.1039/d1nj01725j), 2021-01-01
Supplement: d1nj01725j1.pdf [file d1nj01725j1.pdf]

## Electronic Supplementary Information

### **A size-selective method for increasing the performance of Pt supported on tungstated zirconia catalysts for alkanes isomerization: a combined experimental and theoretical DFT study**

J. Vera-Iturriaga<sup>a</sup>, K. G. Madrigal-Carrillo<sup>b</sup>, M. L. Hernández-Pichardo<sup>a</sup>, J. I. Rodríguez-Hernández<sup>b</sup>, E.

Jiménez-Izal<sup>c,d,\*</sup>, J. A. Montoya de la Fuente<sup>e,\*\*</sup>

<sup>a</sup> *Instituto Politécnico Nacional, ESIQIE, Av. IPN S/N Zacatenco, 07738, México City, México.*

<sup>b</sup> *Instituto Politécnico Nacional, ESFM, Av. IPN S/N Zacatenco, 07738, México City, México.*

<sup>c</sup> *Polimero eta Material Aurreratuak: Fisika, Kimika eta Teknologia Saila, Kimika Fakultatea, Euskal Herriko Unibertsitatea (UPV/EHU) and Donostia International Physics Center (DIPC), M. de Lardizabal Pasealekua 3, Donostia, Euskadi, Spain.*

<sup>d</sup> *IKERBASQUE, Basque Foundation for Science, Bilbao, Euskadi, Spain*

<sup>e</sup> *Instituto Mexicano del Petróleo, Eje Central L. Cárdenas 152, 07730, México City, México.*

\*[elisa.jimenez@ehu.es](mailto:elisa.jimenez@ehu.es) \*\* [amontoya@imp.mx](mailto:amontoya@imp.mx)

New Journal of Chemistry

**Table S1.** Results of Rietveld analysis using Jade 2020.

| Sample  | Phases             | Cell parameters (Å) |                |                | Cell volume (Å <sup>3</sup> ) | Phase concentration wt. % | Crystall size (nm) |
|---------|--------------------|---------------------|----------------|----------------|-------------------------------|---------------------------|--------------------|
|         |                    | a <sub>0</sub>      | b <sub>0</sub> | c <sub>0</sub> |                               |                           |                    |
| WZ15-7  | T-ZrO <sub>2</sub> | 3.5980              | 3.5980         | 5.3672         | 69.5                          | 87.2                      | 11.7               |
|         | M-ZrO <sub>2</sub> | 5.1505              | 5.2116         | 5.3173         | 142.7                         | 7.3                       |                    |
|         | M-WO <sub>3</sub>  | 7.3090              | 7.5220         | 7.6780         | 422.1                         | 5.4                       |                    |
| WZ15-H7 | T-ZrO <sub>2</sub> | 3.5985              | 3.5985         | 5.1873         | 67.2                          | 81.4                      | 10.8               |
|         | M-ZrO <sub>2</sub> | 5.1525              | 5.2074         | 5.3277         | 142.9                         | 10.8                      |                    |
|         | M-WO <sub>3</sub>  | 7.3090              | 7.5220         | 7.6780         | 422.1                         | 7.8                       |                    |
| WZ20-7  | T-ZrO <sub>2</sub> | 3.5960              | 3.5960         | 5.1952         | 67.2                          | 83.8                      | 11.2               |
|         | M-ZrO <sub>2</sub> | 5.1505              | 5.2116         | 5.3173         | 142.7                         | 7.7                       |                    |
|         | M-WO <sub>3</sub>  | 7.3090              | 7.5220         | 7.6780         | 422.1                         | 8.5                       |                    |
| WZ20-7H | T-ZrO <sub>2</sub> | 3.5983              | 3.5983         | 5.1940         | 67.3                          | 81.2                      | 11.4               |
|         | M-ZrO <sub>2</sub> | 5.1505              | 5.2116         | 5.3173         | 142.7                         | 14                        |                    |
|         | M-WO <sub>3</sub>  | 7.3090              | 7.5220         | 7.6780         | 422.1                         | 4.8                       |                    |
| WZ15-8  | T-ZrO <sub>2</sub> | 3.5964              | 3.5964         | 5.1968         | 67.2                          | 81.6                      | 14.5               |
|         | M-ZrO <sub>2</sub> | 5.1505              | 5.2116         | 5.3173         | 142.7                         | 12.3                      |                    |
|         | M-WO <sub>3</sub>  | 7.3090              | 7.5220         | 7.6780         | 422.1                         | 6.1                       |                    |
| WZ15-H8 | T-ZrO <sub>2</sub> | 3.5964              | 3.5964         | 5.1968         | 67.2                          | 81.6                      | 16                 |
|         | M-ZrO <sub>2</sub> | 5.1505              | 5.2116         | 5.3173         | 142.7                         | 12.3                      |                    |
|         | M-WO <sub>3</sub>  | 7.3090              | 7.5220         | 7.6780         | 422.1                         | 6.1                       |                    |
| WZ20-8  | T-ZrO <sub>2</sub> | 3.5965              | 3.5965         | 5.1988         | 67.2                          | 72.2                      | 15.3               |
|         | M-ZrO <sub>2</sub> | 5.1505              | 5.2116         | 5.3173         | 142.7                         | 14.7                      |                    |
|         | M-WO <sub>3</sub>  | 7.3090              | 7.5220         | 7.6780         | 422.1                         | 13.1                      |                    |
| WZ20-H8 | T-ZrO <sub>2</sub> | 3.5915              | 3.5915         | 5.1905         | 67.0                          | 76                        | 14.9               |
|         | M-ZrO <sub>2</sub> | 5.1505              | 5.2116         | 5.3173         | 142.7                         | 17.9                      |                    |
|         | M-WO <sub>3</sub>  | 7.3090              | 7.5220         | 7.6780         | 422.1                         | 6.1                       |                    |

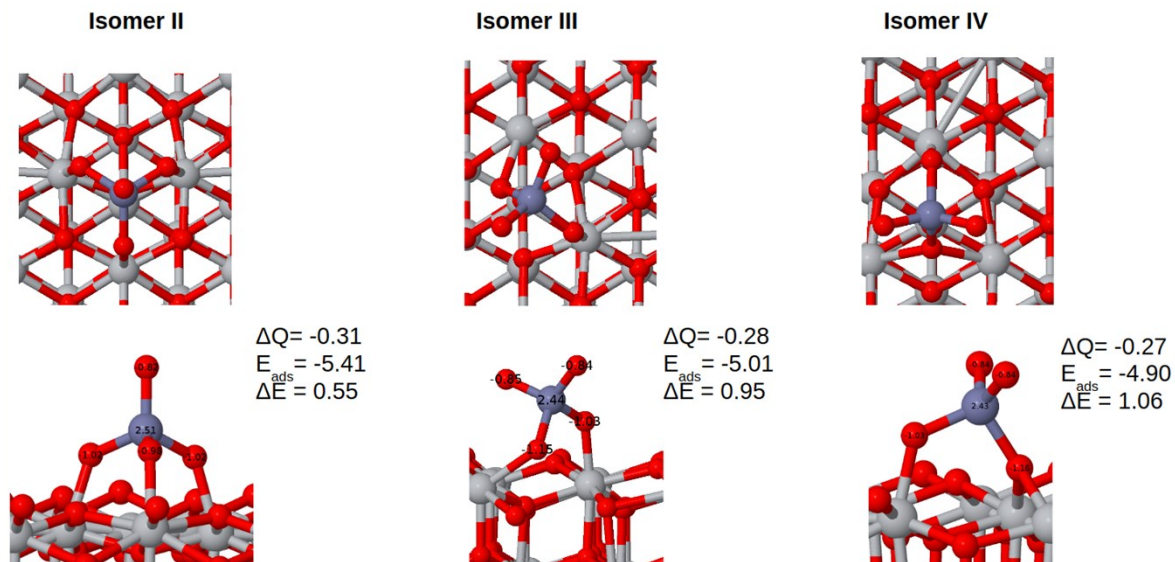

**Figure S1.** Top and side view of the local minima found for the  $\text{WO}_3/\text{ZrO}_2$  system, along with the total Bader charge on the  $(\text{WO}_3)_x$  ( $\Delta Q$ ), adsorption energies to the support ( $E_{\text{ads}}$ ), and energy difference of each isomer with respect to the putative global minima ( $\Delta E$ ), in eV. Bader charges are depicted on the atoms. W, O, and Zr atoms are shown in purple, red, and grey, respectively.

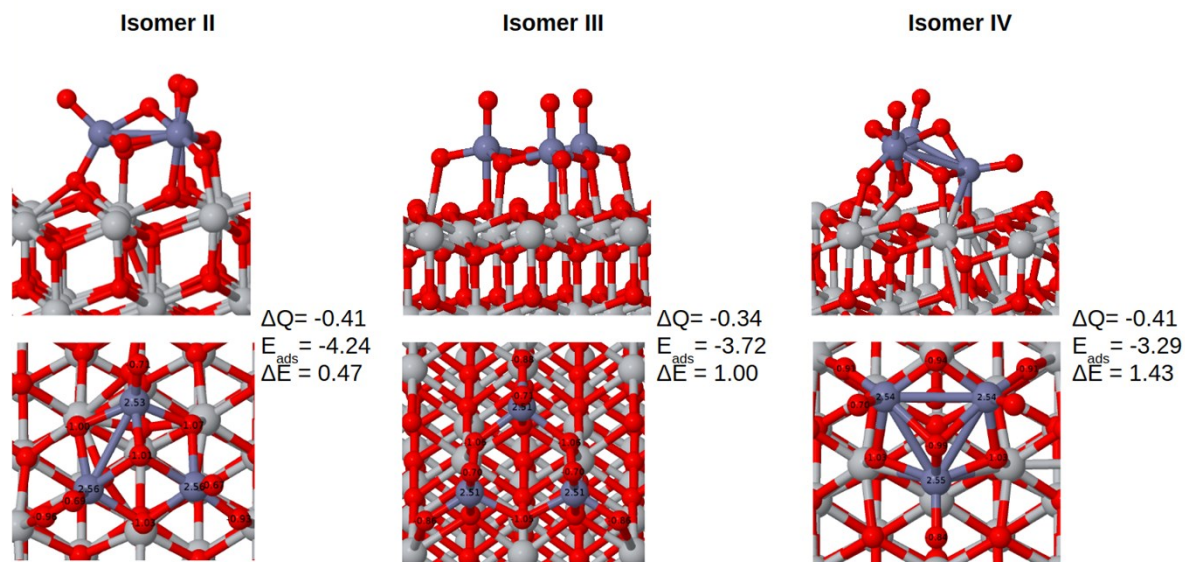

**Figure S2.** Side and top view of the local minima found for the  $(\text{WO}_3)_3/\text{ZrO}_2$  system, along with the total Bader charge on the  $(\text{WO}_3)_x$  ( $\Delta Q$ ), adsorption energies to the support ( $E_{\text{ads}}$ ), and energy difference of each isomer with respect to the putative global minima ( $\Delta E$ ), in eV. Bader charges are depicted on the atoms. W, O, and Zr atoms are shown in purple, red, and grey, respectively.

The surface tungsten density is a common synthesis parameter reported for tungstated zirconia catalysts, assuming all tungsten is on the surface. In this work it was calculated following the formula reported for Naito et al. [1], as follows:

Surface tungsten density (W atom/nm<sup>2</sup>) = [WO<sub>3</sub> loading (wt.%)/100]/231.8 (formula weight of WO<sub>3</sub>) · 6.023 × 10<sup>23</sup> / [BET surface area (m<sup>2</sup> g<sup>-1</sup>) × 10<sup>18</sup>].

[1] “Tungsten oxide monolayer loaded on zirconia: determination of acidity generated on the monolayer”, N. Naito, N. Katada and M. Niwa, *J. Phys. Chem*, 1999, **103**, 7206.
